# Supplementary material for: Reaching everyone in general practice? Feasibility of an integrated domestic violence training and support intervention in primary care
Source: PubMed Central journal article supplement (PMC7802315; doi:10.1186/s12875-020-01297-5), 2021-01-12
Supplement: 12875_2020_1297_MOESM3_ESM.pdf [file 12875_2020_1297_MOESM3_ESM.pdf]

**Study to test the feasibility of a training and support intervention for general practice to improve the response to women, men and children exposed to domestic violence and abuse (DVA)**

**Interview schedule for clinicians – Time point 1\***

***Introductory statement***

Thank you for agreeing to do this interview. I would like to ask you some questions about how you felt about the domestic violence training that you recently attended and how you feel it has impacted on your clinical practice. The interview will last between 20-30 minutes. If there are any questions that you don't feel comfortable answering, just tell me and I'll move on to another topic. Or, if you decide you want to stop the interview altogether that's fine, just let me know. Our conversation today is completely confidential.

We are interested in hearing about their views and experiences. Although I have a list of questions, please do mention anything that you think is important that I don't ask you. If anything is unclear during the interview, let me know.

**Consent checklist**

Check participant:

- Has read the participant information sheet
- Understands that their participation is voluntary and that they can change their mind and withdraw at any time without having to give a reason and this won't impact on the support that they are receiving from the IRIS+ service.
- Understands that if I have serious concerns about their safety, or that of any children they mention, that I may need to share this concern with an appropriate agency.
- Understands that personal information about them (such as my name and address) will be treated with strict confidence and securely stored separately from all other data about them (e.g. interview transcripts) at the University of Bristol.
- Agrees that the anonymised information collected about them (anonymised transcripts) may be used to support the current research and relevant future research and may be shared anonymously.

Any questions?

**Consent for recording**

With your permission, I'd like to digitally record the interview. This is so the interview can be transcribed. It will be erased after being transcribed. All names of people or places which might identify you or others will not be transcribed. Are you happy to continue with the interview and for it to be digitally recorded?

The recording of the interview will be kept securely and only the anonymised transcript of that interview will be used within the research. The recordings themselves will be erased after transcription.

Can I just confirm that I have your consent to be audio-recorded while this interview takes place?

I'll turn the recorder on now then, and for the record state:

**Today's date is..... my name is..... and your name is ..... and I have your consent to carry out/record this interview? (yes)**

### ***Training reflections***

**Check/confirm with participant how many sessions they attended/were provided to their practice.**

**Can you tell me what you remember about the first training session?**

- Can you talk me through what you did?
- What the focus of the session was on?
- Take home message? / Most useful thing you gained from the training?

**IF APPROPRIATE: Can you tell me what you remember about the second training session?**

- Can you talk me through what you did?
- What the focus of the session was on?
- Take home message? / Most useful thing you gained from the training?

**Which parts/aspects of the training did you think were the most useful for your professional role? Did you learn any new skills from the training?**

- Why was it useful?
- What has this training helped you do in practice?
- Were there any aspects that you felt were not relevant to your role? If yes, how did you feel about it's inclusion?

**What aspects of the training were not useful or helpful?**

Follow up probes:

- Can you describe what didn't work so well in the training?
- Was material repetitive?
- Already known to audience?
- Not explained enough?

**What is your opinion on the style and format of the sessions?**

Follow up probes:

- What do you think we could do to improve the training?
- Did you use the online resources?
- Quality of trainers – e.g. substantive knowledge/presentation/ability to answer questions
- Length of training
- Can you think of anything that would make it better for the future?
- How could we make it more relevant to your role?
- Any evidence it has helped the team e.g. discussions in practice meetings?

**What was missing from the training that you would have liked to be included and why?**

### ***Implementation of training***

Begin with personalisation i.e. summary of referrals from [practice name]

**We know that some training is quite easy to go away and implement immediately and that other training is harder to put into application. How have you found it with the IRIS+ training?**

- What have you done differently in your practice since the training?
- Has your opinion changed in any way? E.g. in relation to men being victims/perpetrators, women being victims/perpetrators, children being exposed to DVA?

**Have you responded to a situation where you suspected a male patient was a victim or perpetrator of domestic violence - can you give me some examples?**

- How did you feel asking patient about DVA?
- Did it impact on relationship with patient?
- Did you make a referral? Why/why not? (may want to probe if men willing for a referral to happen)
- Have any difficulties arisen as a result of your enquiries re DVA?
- Did the training prepare you for these situations? Why/Why not?
- Any other thoughts about this?

**Have you responded to a situation where you suspected a child patient was exposed to DVA - can you give me some examples?**

- How did you feel asking child or parent/carer about DVA?
- Did it impact on relationship with patient either parent or child?
- Did you make a referral? Why/why not? (may want to probe if parent/carer/child willing for a referral)
- Have any difficulties arisen as a result of your enquiries re DVA?
- Did the training prepare you for these situations? Why/Why not?
- Any other thoughts about this?
- 

**Have you made any referrals to Children's Social Care because you were concerned about a child safeguarding issues? If yes**

- Did you discuss the matter with another professional before making a referral?
- Did the training support your identification of potential safeguarding issues in relation to DVA? Why/why not?
- Do you know what the outcome of the referral was?
- Any other thoughts about the referral process?

**Have you responded to situation where a female patient was a victim or perpetrator of domestic violence - can you give me some examples?**

- How did you feel asking patient about DVA?
- Did it impact on relationship with patient?
- Did you make a referral? Why/why not? (may want to probe if patient willing for referral)
- Have any difficulties arisen as a result of your enquiries re DVA?
- Did the training prepare you for these situations? Why/Why not?
- Any other thoughts about this?

**Were there any obstacles to referring?**

- What were these?
- Could the researchers or advocate educators done anything to help make things easier?
- Did patients refuse to be referred?
- Can you tell us why they refused?

***3<sup>rd</sup> party referrals and working with others***

- Have you received any 3<sup>rd</sup> party referrals since your training?

- If so, can you talk me through what you did with these referrals/information?
- Did your attendance at the IRIS+ training influence the actions you took/plan to take (now or in the future)?

### ***Support***

**What support (either formal or informal) have you been provided with since the training?(e.g. links with advocate educator, social worker)**

Follow-up probes:

- How useful has it been?
- Is it enough support or is more needed?
- What kind of support do you think health professionals need in order to deal with domestic violence in their clinical practice?
- Anything else that could be useful? E.g. email reminders, support from AE?

### ***Future training***

**Would you like any further training on domestic violence – what aspects would you be most interested in and why? E.g. further training needs**

### ***Conclusion***

**Let the participant know that it's the end of your questions and ask them if there are any other comments that they would like to make.**

**Thank participant for their time.**

## Interview Schedule for clinicians – Time point 2\*

***Introductory statement***

***Consent checklist***

***Consent for recording***

**Interviewer provides participant with update on referrals made to IRIS+ service**

### **Experiences of referral process and implementation of training into practice**

- How have you found the referral process?
- What has been your experience of implementing IRIS+ training into your day-to-day clinical practice? (e.g. asking men, women and children about potential DVA)
- Have you experienced any barriers or challenges in asking patients about DVA or referring those patients to IRIS+? Please describe.
- Would you feel comfortable asking a male patient about domestic violence and abuse? If you would not, or would feel unsure about doing so, what are the reasons for this? Has this changed since you attended the IRIS+ training?
- Would you feel comfortable asking a child or young person about domestic violence and abuse? If you would not, or would feel unsure about doing so, what are the reasons for this? Has this changed since you attended the IRIS+ training?
- Thinking about your surgery/the surgery you are affiliated with, what are your colleagues' experiences of implementing IRIS+?
- Overall, do you have any suggestions as to how we can improve the IRIS+ training or referral pathway to increase the number of identifications of domestic violence and abuse and referrals to our specialist service (particularly men and children)?
- Have you had a chance to look at the new online resource? If so, what are your impressions of it? What is helpful/not helpful?
- Have you received any 3<sup>rd</sup> party reports in relation to DVA since attending the training? If so, please talk me through how the report(s) were processed and if attending the IRIS+ training impacted on this.

**Conclusion**

Let the participant know that it's the end of your questions and ask them if there are any other comments that they would like to make.

Thank participant for their time.

\*Please note this is a suggested guide for interviews only. In keeping with standard practice in qualitative research, these questions may be modified & added to as the study progresses and new themes or areas of interest emerge. We will also adapt this guide for use with participants at earlier or later stages of the study.
